# Supplementary material
Source: PubMed Central journal article supplement (PMC5565459)
Supplement: pnas.1707694114.sapp.pdf [file pnas.1707694114.sapp.pdf]

**Supporting information to:**

**Time-resolved observation of protein allosteric communication**

Sebastian Buchenberg, Florian Sittel and Gerhard Stock<sup>1</sup>

*Biomolecular Dynamics, Institute of Physics,  
Albert Ludwigs University, 79104 Freiburg, Germany*

E-mail: [stock@physik.uni-freiburg.de](mailto:stock@physik.uni-freiburg.de)

April 26, 2017

---

<sup>1</sup> To whom correspondence should be addressed

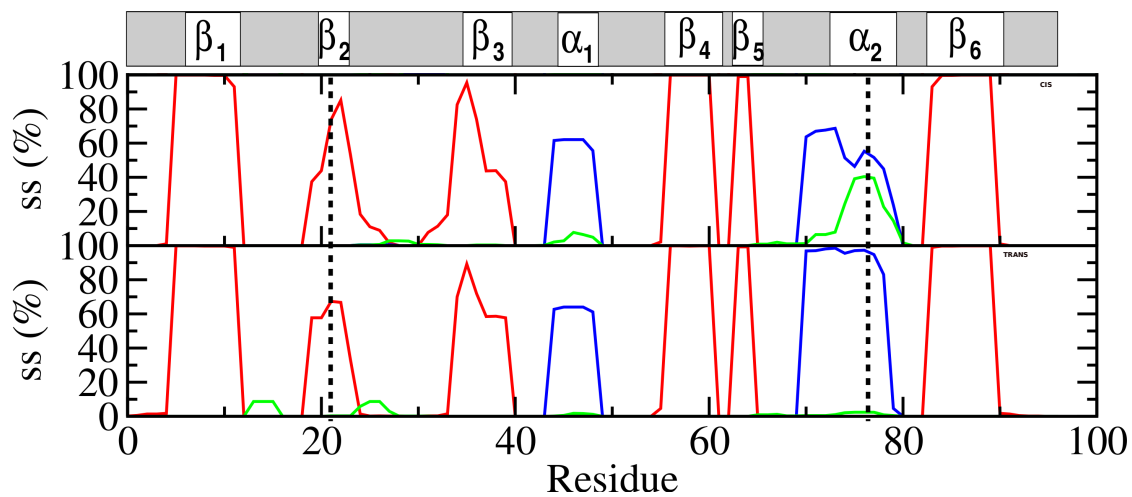

FIG. S1: Secondary structure content of PDZ2S in (top) *cis* and (bottom) *trans* state for the equilibrium MD simulations. The content of  $\beta$ -sheet (red),  $\alpha$ -helical (blue) and  $3_{10}$ -helical conformations of the individual residues are shown obtained by DSSP (W. Kabsch and C. Sander, Biopolymers 22, 2577-2637 (1983)).

| $S_i$                  | $S_j$                  | $i$    | $j$    | $\Delta P$ | type             |
|------------------------|------------------------|--------|--------|------------|------------------|
| $\alpha_2$             | $\alpha_2$             | Gln-73 | Thr-77 | 0.31       | HB <sub>mc</sub> |
| $\alpha_2$             | $\alpha_2$             | Ala-74 | Leu-78 | 0.41       | HB <sub>mc</sub> |
| $\alpha_2$             | $\alpha_2$             | Val-75 | Arg-79 | 0.40       | HB <sub>mc</sub> |
| $\alpha_2$             | $\alpha_2$             | Val-75 | Leu-78 | -0.42      | HB <sub>mc</sub> |
| $\alpha_2$             | $\beta_1$ - $\beta_2$  | Cys-76 | Ser-17 | -0.34      | -                |
| $\alpha_2$             | $\beta_1$ - $\beta_2$  | Leu-78 | Lys-13 | -0.40      | -                |
| $\alpha_2$             | $\beta_1$ - $\beta_2$  | Leu-78 | Leu-18 | -0.39      | np               |
| $\alpha_2$             | $\beta_2$              | Val-75 | Val-22 | -0.32      | np               |
| $\alpha_2$             | $\beta_2$              | Arg-79 | Cys-21 | 0.64       | -                |
| $\alpha_2$             | $\beta_3$              | Ala-74 | Ile-35 | 0.37       | np               |
| $\alpha_2$             | $\beta_3$              | Leu-78 | Ile-35 | 0.50       | np               |
| $\alpha_2$             | $\beta_5$              | Thr-77 | Val-64 | 0.31       | -                |
| $\alpha_2$             | $\beta_6$              | Leu-78 | Val-85 | -0.33      | np               |
| $\alpha_2$             | $\beta_5$ - $\alpha_2$ | Gln-73 | Ala-69 | 0.35       | -                |
| $\alpha_2$             | $\beta_5$ - $\alpha_2$ | Ala-74 | Ala-69 | 0.30       | np               |
| $\alpha_2$             | $\beta_5$ - $\alpha_2$ | Val-75 | Leu-66 | -0.34      | np               |
| $\alpha_2$             | $\beta_5$ - $\alpha_2$ | Thr-77 | Leu-66 | 0.50       | -                |
| $\beta_5$ - $\alpha_2$ | $\beta_5$              | Gly-68 | Ser-65 | 0.41       | HB <sub>sc</sub> |
| $\beta_6$              | C                      | Glu-90 | Gln-93 | 0.38       | -                |
| $\beta_1$ - $\beta_2$  | $\beta_1$ - $\beta_2$  | Lys-13 | Asp-15 | -0.38      | -                |
| $\beta_1$ - $\beta_2$  | $\beta_1$ - $\beta_2$  | Lys-13 | Ser-17 | 0.32       | -                |
| $\beta_1$ - $\beta_2$  | $\beta_1$ - $\beta_2$  | Asn-14 | Ser-17 | 0.42       | HB <sub>mc</sub> |
| $\beta_1$ - $\beta_2$  | $\alpha_2$ - $\beta_6$ | Asn-14 | Gln-83 | -0.40      | -                |
| $\beta_2$ - $\beta_3$  | $\beta_2$ - $\beta_3$  | Gly-24 | Gly-34 | -0.32      | -                |
| $\beta_2$ - $\beta_3$  | $\beta_5$ - $\alpha_2$ | His-32 | Glu-67 | 0.32       | -                |
| $\beta_2$ - $\beta_3$  | C                      | Val-30 | Ser-94 | 0.38       | -                |
| $\beta_2$ - $\beta_3$  | C                      | Val-30 | Pro-95 | 0.31       | -                |
| $\beta_3$              | $\beta_5$ - $\alpha_2$ | Ile-35 | Ala-69 | -0.41      | np               |
| $\beta_3$              | $\beta_5$ - $\alpha_2$ | Ile-35 | Thr-70 | -0.39      | -                |
| $\beta_3$              | C                      | Tyr-36 | Ser-94 | 0.43       | -                |
| $\alpha_1$ - $\beta_4$ | C                      | Gly-55 | Gln-93 | 0.34       | -                |
| $\alpha_1$ - $\beta_4$ | C                      | Gly-55 | Ser-94 | 0.44       | -                |
| $\beta_4$              | $\beta_5$ - $\alpha_2$ | Arg-57 | Glu-67 | 0.34       | -                |
| $\beta_4$              | $\alpha_2$ - $\beta_6$ | Val-61 | Thr-81 | 0.35       | -                |

TABLE S1: Contacts between residue  $i$  in segment  $S_i$  and residue  $j$  in segment  $S_j$  that change significantly ( $\Delta P_{ij} \geq 0.3$ ) upon *cis-trans* isomerization of PDZ2S, where  $\Delta P_{ij} = P_{ij}^{\text{trans}} - P_{ij}^{\text{cis}}$  denotes the change of the contact probability. Here  $P_{ij}^{\text{cis}}$  or  $P_{ij}^{\text{trans}}$  denote the probability that the minimal distance between residue  $i$  and  $j$  in PDZ2S-*cis* or -*trans*, respectively, is below 0.45 nm. The last column indicates whether a given contact is a H bond within the main chain (HB<sub>mc</sub>), a H bond between the main and a side chain (HB<sub>sc</sub>), or a contact between two hydrophobic residues (np). In line with the discussion, the upper part of the table describes contact changes at the  $\alpha_2$  side and the lower part changes at the  $\beta_2$  side of the binding pocket.

| Residue | rmsd(nm) | Region               | <i>cis</i>                                          | <i>trans</i>                                             | $\Delta d_{i-1,i+1}$ (nm) | <i>s</i> |
|---------|----------|----------------------|-----------------------------------------------------|----------------------------------------------------------|---------------------------|----------|
| Gly-4   | 0.010    | N                    | $\delta'$                                           | $\delta', P_{II}, \epsilon$                              | 0.0144( $\pm 0.0100$ )    | 1        |
| Lys-13  | 0.016    | $\beta_1 - \beta_2$  | $\beta, P_{II}, \zeta, \delta'$                     | $P_{II}$                                                 | 0.0052( $\pm 0.016$ )     | 0        |
| Asn-14  | 0.040    |                      | $P_{II}, \alpha, P'_{II}, (\beta)$                  | $\beta, (P_{II}, \alpha)$                                | 0.034( $\pm 0.016$ )      | 1        |
| Asp-15  | 0.042    |                      | $\alpha, \beta, \gamma, \delta$                     | $\delta'$                                                | -0.065( $\pm 0.017$ )     | -1       |
| Asn-16  | 0.053    |                      | $\alpha, \beta, P_{II}, \delta, \delta'$            | $\delta', \alpha$                                        | -0.077( $\pm 0.013$ )     | -1       |
| Gly-19  | 0.0094   |                      | $\delta', P'_{II}$                                  | $\delta'$                                                | -0.009( $\pm 0.013$ )     | 0        |
| Gly-25  | 0.027    | $\beta_2 - \beta_3$  | $\beta, P_{II}, \alpha, P'_{II}, \epsilon, \delta'$ | $P_{II}, (P'_{II}, \epsilon)$                            | -0.053( $\pm 0.023$ )     | -1       |
| Val-26  | 0.016    |                      | $\beta, P_{II}, (\alpha)$                           | $\beta, P_{II}, \delta', (\alpha)$                       | -0.024( $\pm 0.016$ )     | -1       |
| Asn-27  | 0.016    |                      | $P_{II}, \alpha, \delta$                            | $\delta', (\beta, P_{II})$                               | -0.005( $\pm 0.024$ )     | 0        |
| Thr-28  | 0.013    |                      | $\beta, P_{II}, \alpha$                             | $\beta, (P_{II}, \alpha, \delta')$                       | 0.020( $\pm 0.025$ )      | 0        |
| Ser-29  | 0.023    |                      | $\alpha, \delta', (P_{II})$                         | $\alpha, \delta', P_{II}$                                | 0.016( $\pm 0.018$ )      | 0        |
| Arg-31  | 0.015    |                      | $\alpha, \delta', (P_{II})$                         | $\beta, \delta', \alpha, \gamma$                         | 0.017( $\pm 0.021$ )      | 0        |
| Gly-33  | 0.029    |                      | $P_{II}, \epsilon, \alpha, \delta', P'_{II}$        | $P_{II}, \epsilon, \alpha, \delta', P'_{II}, (\epsilon)$ | -0.038( $\pm 0.020$ )     | -1       |
| Gly-34  | 0.014    |                      | $P_{II}, P'_{II}, \epsilon$                         | $P_{II}, P'_{II}, (\epsilon)$                            | -0.0111( $\pm 0.0076$ )   | -1       |
| Lys-54  | 0.013    | $\alpha_1 - \beta_4$ | $P_{II}, \alpha$                                    | $P_{II}, (\alpha)$                                       | 0.0156( $\pm 0.0078$ )    | 1        |
| Leu-66  | 0.011    | $\beta_5 - \alpha_2$ | $\alpha, (\beta)$                                   | $\alpha$                                                 | -0.0156( $\pm 0.0038$ )   | -1       |
| Glu-67  | 0.024    |                      | $P_{II}, \alpha$                                    | $\alpha, (P_{II})$                                       | -0.026( $\pm 0.014$ )     | -1       |
| Gly-68  | 0.025    |                      | $\alpha, \delta', \gamma$                           | $\alpha, \delta', (\gamma)$                              | -0.029( $\pm 0.014$ )     | -1       |
| Ala-69  | 0.020    |                      | $\beta, P_{II}, (\alpha)$                           | $\beta, P_{II}$                                          | 0.036( $\pm 0.015$ )      | 1        |
| Thr-70  | 0.027    |                      | $P_{II}, \alpha, \delta'$                           | $P_{II}$                                                 | 0.023( $\pm 0.013$ )      | 1        |
| His-71  | 0.012    |                      | $\alpha, (\beta, P_{II})$                           | $\alpha$                                                 | -0.015( $\pm 0.017$ )     | 0        |
| Cys-76  | 0.0098   | $\alpha_2$           | $\delta, \alpha$                                    | $\alpha$                                                 | -0.0005( $\pm 0.0025$ )   | 0        |
| Asn-80  | 0.017    | C                    | $\alpha, \gamma'$                                   | $\gamma', (\alpha, \beta)$                               | -0.01085( $\pm 0.0050$ )  | -1       |
| Gly-92  | 0.030    |                      | $P_{II}, (P'_{II})$                                 | $P_{II}, \alpha', \delta'$                               | -0.0412( $\pm 0.014$ )    | -1       |

TABLE S2: Residues  $i$  showing large changes in their main chain conformations between *cis* and *trans* state and extent of changes. The latter is quantified in terms of the rmsd between the average structures of the residues in the *cis* and *trans* state. Only residues with rmsd values above 0.085 nm are listed. Corresponding motifs in the *cis* and *trans* state are given in the nomenclature proposed by Hollingsworth and Karplus (Bioimol. Concepts 1, 271-283 (2010)). Brackets indicate motifs that are only weakly populated. In addition, changes in the  $C_\alpha$  distances between corresponding neighboring residues  $i-1$  and  $i+1$ ,  $\Delta d_{i-1,i+1}$ , are given. The rightmost column,  $s$ , indicates whether the changes are within the statistical error ( $s = 0$ ), or, if not, indicating that residue  $i$  is a hinge residue, it yields the sign of  $\Delta d_{i-1,i+1}$ . Thus,  $s < 0$  or  $s > 0$  means that the  $C_\alpha$  distance between residues  $i-1$  and  $i+1$  is reduced or increased, respectively.

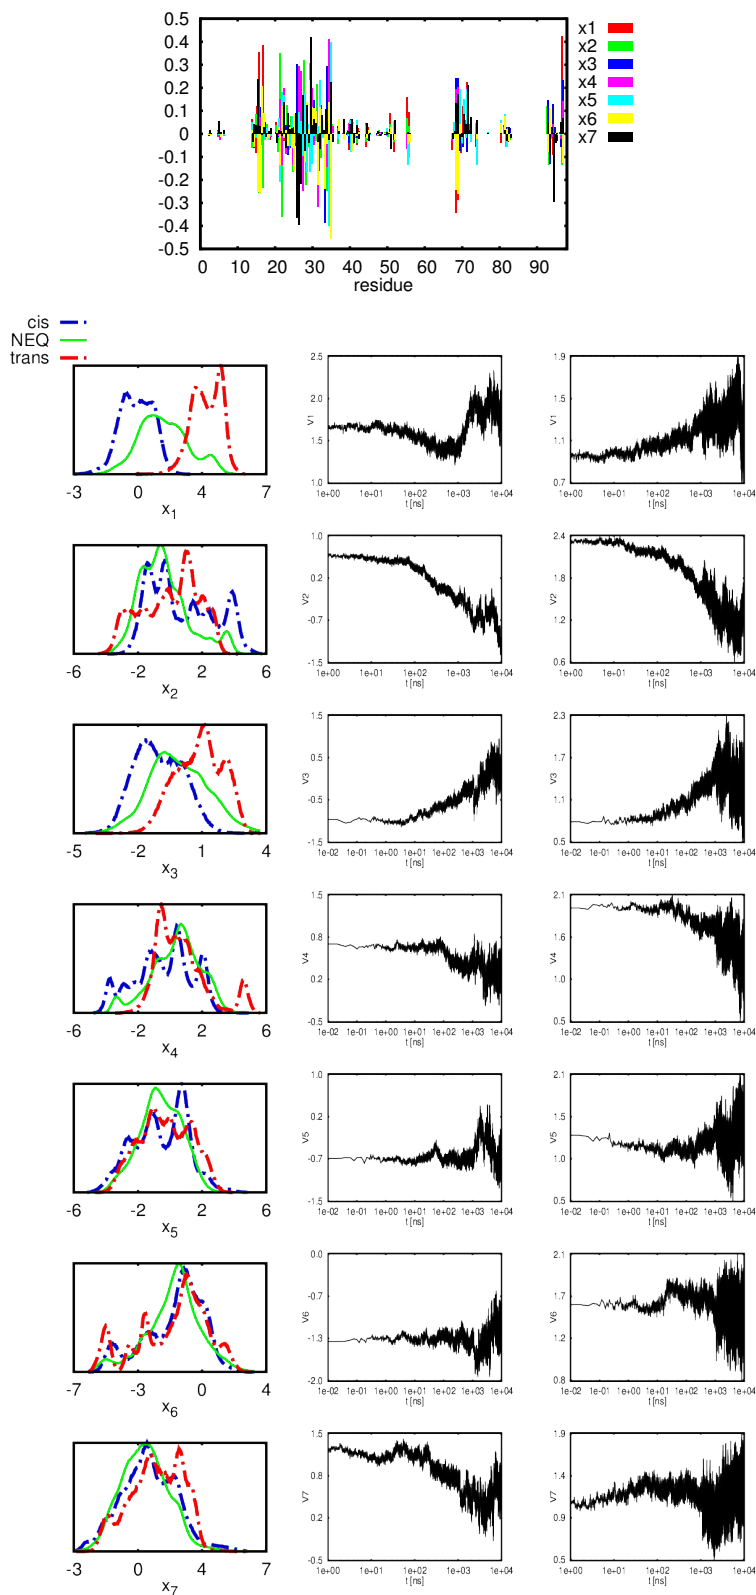

FIG. S2: (Top) Influence of the 95 preselected dihedral angles on the first seven eigenvectors of dPCA+ (see Methods section of main text). (Bottom) Distributions and time traces of the means and variances of principal components  $x_1 - x_7$ .

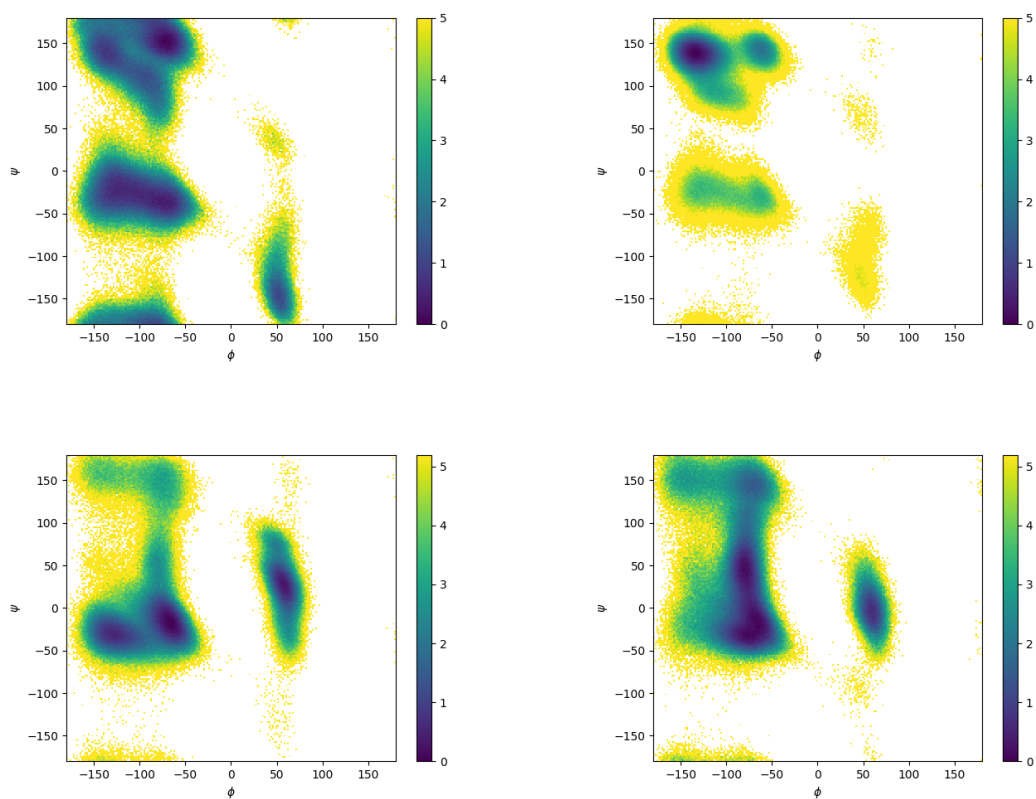

FIG. S3: Ramachandran plots of (top left) Asn<sub>14</sub> in *cis*, (top right) Asn<sub>14</sub> in *trans*, (bottom left) Ser<sub>29</sub> in *cis*, and (bottom right) Ser<sub>29</sub> in *trans* configuration.

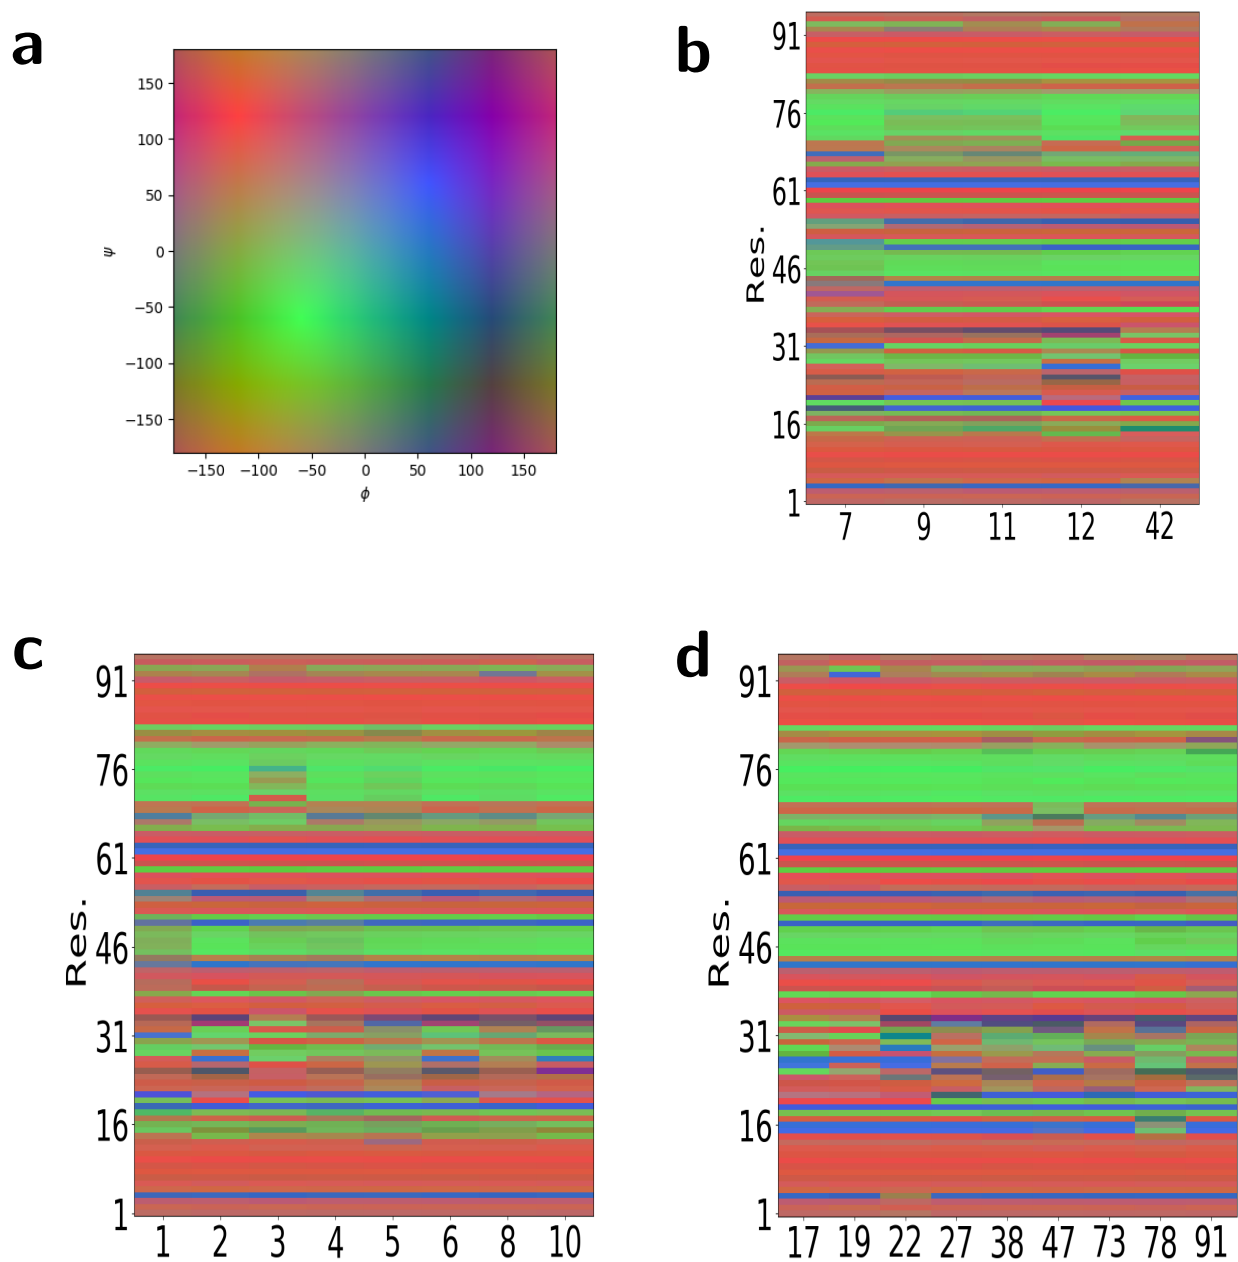

FIG. S4: Ramacolor plots (F. Sittel and G. Stock, *J. Chem. Theory Comp.* 12, 2426-2435 (2016)) for selected *cis* (b), NEQ (c), and *trans* (d) microstates. As displayed by the  $\phi, \psi$  color space in (a), the plots give an impression of the structural differences of states and their respective secondary structure content. The x-axis gives the state while the y-axis denotes the index of a residue. The colors of the boxes are computed from the color code weighted by the intra state distribution in the Ramachandran plot. The typical secondary structure elements are highlighted by green ( $\alpha$ -helix), red ( $\beta$ -sheet) and blue (left-handed  $\alpha$ -helix).

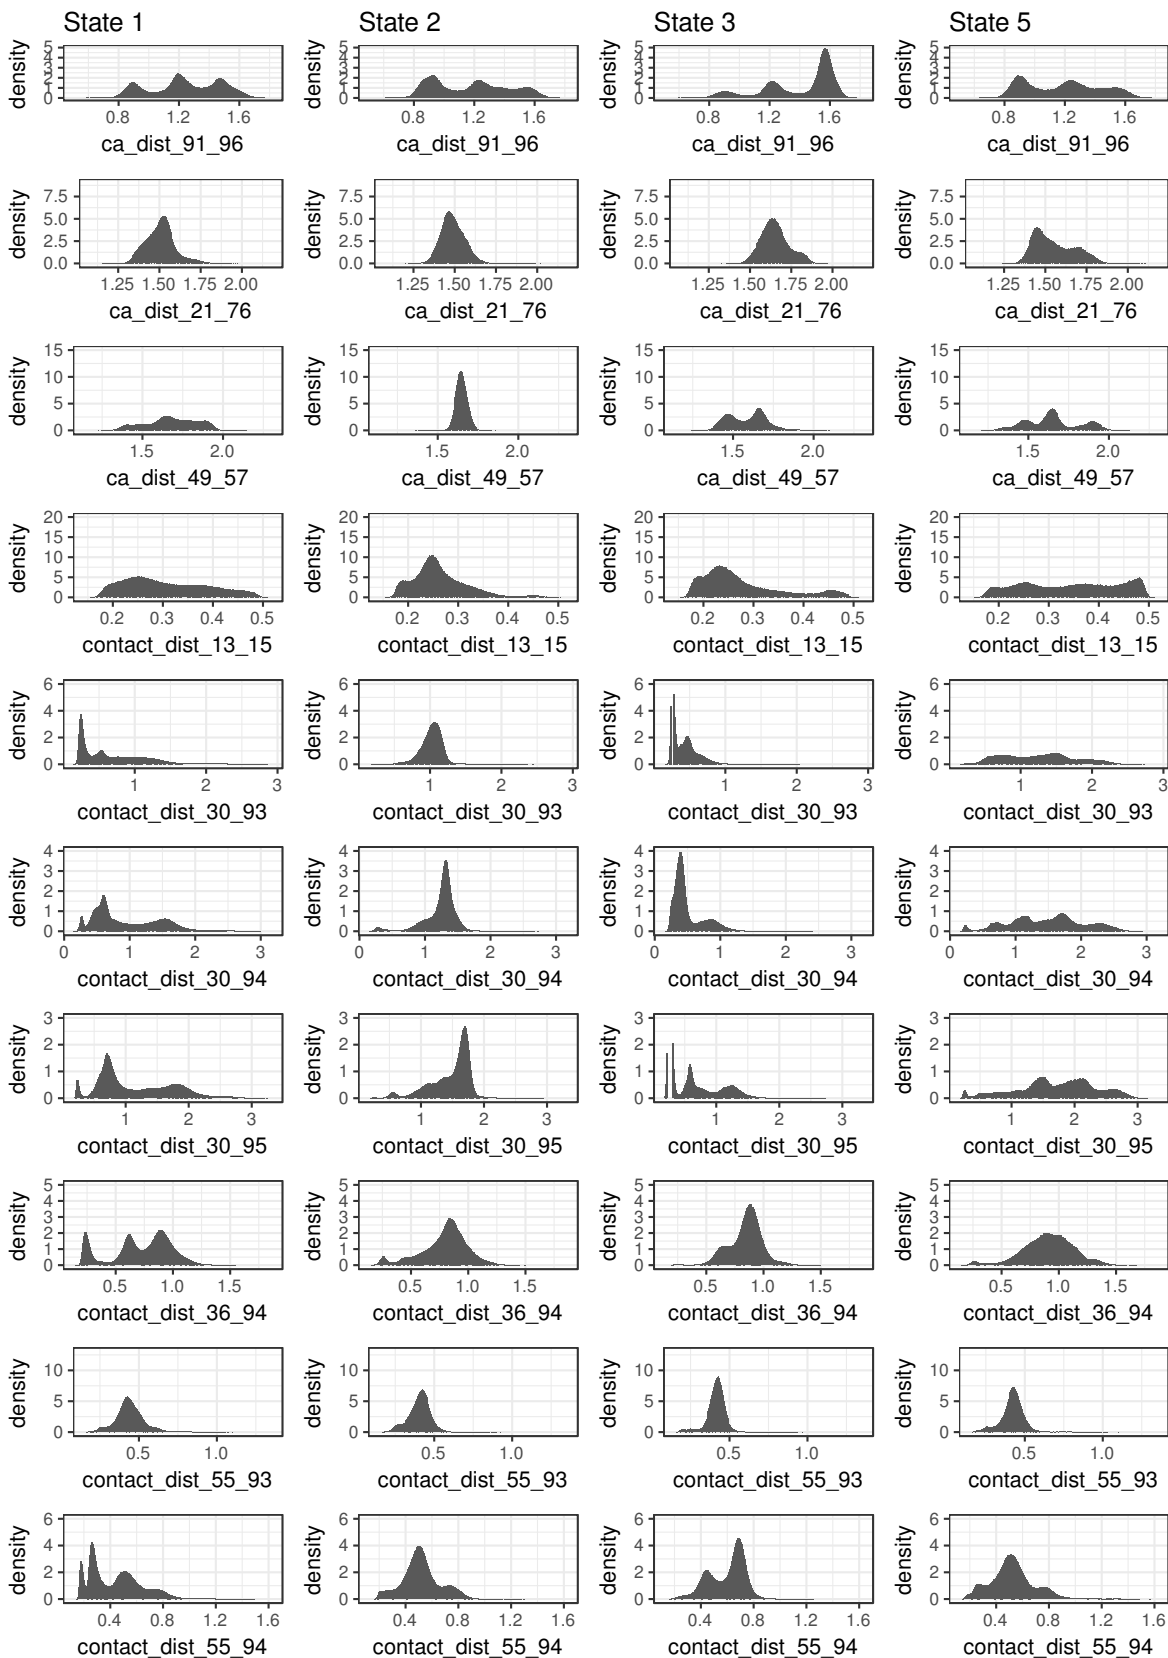

FIG. S5: Distance distributions (in units of nm) of selected microstates (1 of 2).



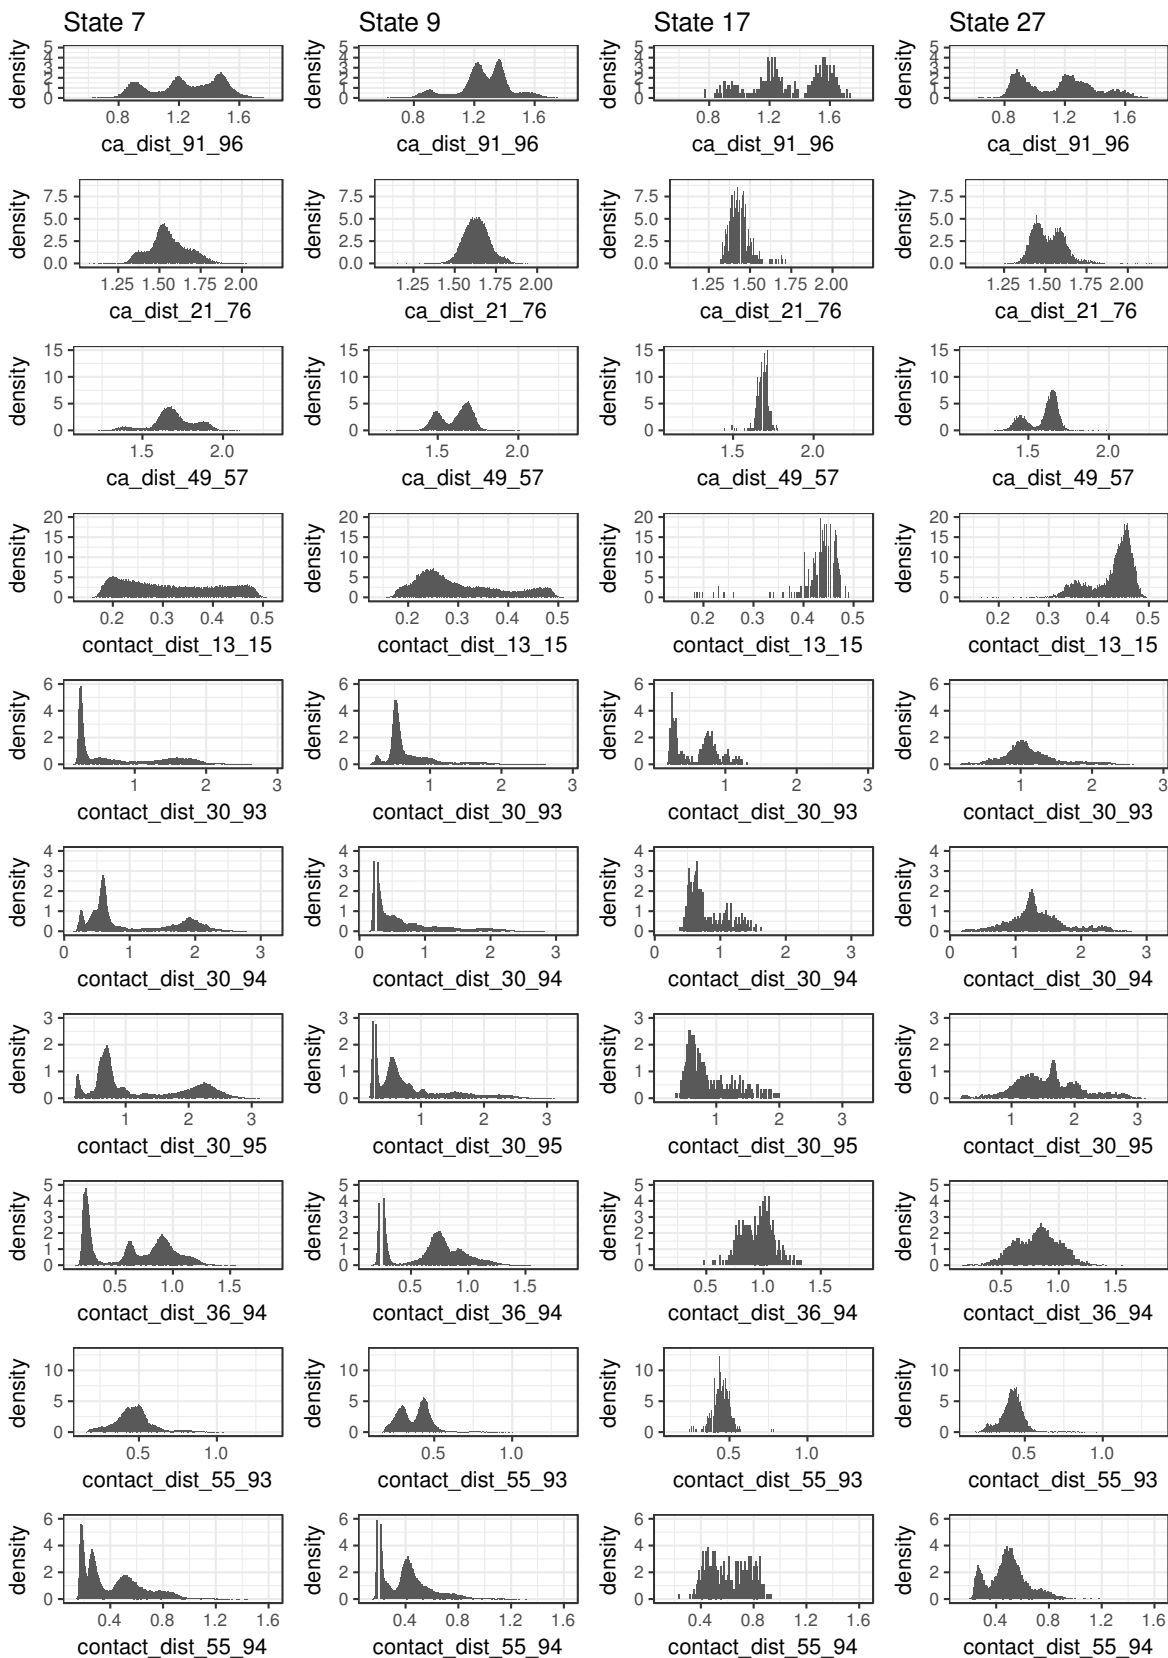

FIG. S5: Distance distributions (in units of nm) of selected microstates (2 of 2).

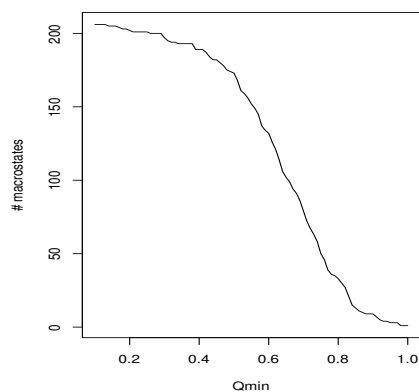

FIG. S6: Number of macrostates as a function of the metastability  $Q_{\min}$  using a lag time of  $\tau = 1$  ns. The macrostates are based on dynamical clustering using the Most Probable Path method by A. Jain and G. Stock (J. Chem. Theory Comp. 8, 3810-3819 (2012)).

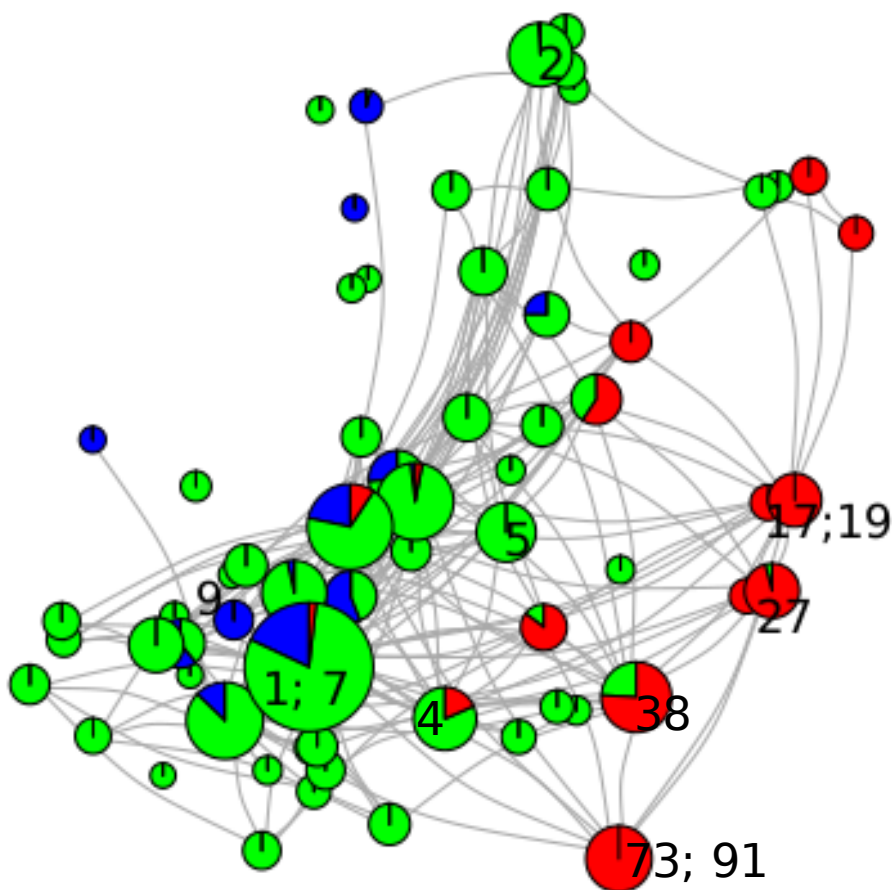

FIG. S7: Dynamical network of macrostates obtained for  $Q_{\min} = 0.72$ , placing the states according to their position in  $x_1$ - $x_2$  space. Nodes are colored by their respective content of microstates identified as *cis* (blue), NEQ (green) or *trans* (red). Selected microstates are labeled at the macrostate they are part of. As in Fig. S6, the macrostates and connections are based on dynamical clustering using the Most Probable Path method.
